# Supplementary material
Source: PubMed Central journal article supplement (PMC4442085)
Supplement: NIHMS662584-supplement-Supplement_Tables.pdf [file NIHMS662584-supplement-Supplement_Tables.pdf]

A

| Transcript ID | Gene Symbol | REFSEQ    | P Value IDTCs vs Parent | Fold Change IDTCs vs Parent |
|---------------|-------------|-----------|-------------------------|-----------------------------|
| 8008201       | NGFR        | NM_002507 | 3.08129E-05             | 1.84701                     |
| 8075992       | SOX10       | NM_006941 | 3.37383E-06             | 1.79705                     |
| 8084165       | SOX2        | NM_003106 | 0.00227213              | 1.342                       |
| 8117165       | SOX4        | NM_003107 | 1.17396E-05             | 2.65369                     |
| 7939341       | CD44        | NM_000610 | 1.55084E-06             | 1.7683                      |
| 8131682       | ABCB5       | NM_178559 | 1.21477E-06             | 3.95822                     |
| 8140752       | ABCB4       | NM_000443 | 0.00110056              | 1.2873                      |
| 8137332       | ABCB8       | NM_007188 | 0.0093655               | 1.30422                     |
| 8018038       | ABCA5       | NM_018672 | 3.50344E-05             | 1.98902                     |

B

| Transcript ID | Gene Symbol | REFSEQ       | P Value IDTCs vs Parent | Fold Change IDTCs vs Parent |
|---------------|-------------|--------------|-------------------------|-----------------------------|
| 8004671       | KDM6B       | NM_001080424 | 0.00076689              | 1.21001                     |
| 8166956       | KDM6A       | NM_021140    | 0.00103372              | 1.47703                     |
| 8117081       | KDM1B       | NM_153042    | 1.55193E-05             | 1.48761                     |
| 7923453       | KDM5B       | NM_006618    | 1.12686E-06             | 1.63945                     |
| 7960221       | KDM5A       | NM_001042603 | 0.000025801             | 1.75428                     |
| 8043283       | KDM3A       | NM_018433    | 1.53155E-05             | 1.62645                     |

|                       |   |   |
|-----------------------|---|---|
| Antibody Origin       | R | M |
| 0                     |   |   |
| Replicated Antibodies | 1 | 2 |

| Order | Sample description | Sample Ty          | 96-well PC | 96-well def | X14.3.3_be | X14.3.3_ep |
|-------|--------------------|--------------------|------------|-------------|------------|------------|
|       |                    |                    |            | Normalized  | Normalized |            |
|       | <b>WM164</b>       |                    |            |             |            |            |
| 25    | Parent 1 (DMSO)    | Human Cell Plate 1 | C1         | 0.479581    | 0.590259   |            |
| 26    | Parent 2 (DMSO)    | Human Cell Plate 1 | C2         | 0.4372348   | 0.5979581  |            |
| 27    | parent 3 (DMSO)    | Human Cell Plate 1 | C3         | 0.4468322   | 0.6277251  |            |
| 28    | Parent 4 (DMSO)    | Human Cell Plate 1 | C4         | 0.4294392   | 0.6377387  |            |
| 29    | IDTCS1 (500nM PLX) | Human Cell Plate 1 | C5         | 0.4742407   | 0.7471706  |            |
| 30    | IDTCS2 (500nM PLX) | Human Cell Plate 1 | C6         | 0.4878201   | 0.7834281  |            |
| 31    | IDTCS3 (500nM PLX) | Human Cell Plate 1 | C7         | 0.4169261   | 0.7684928  |            |
| 32    | IDTCS4 (500nM PLX) | Human Cell Plate 1 | C8         | 0.4320499   | 0.7785121  |            |

(M) = Mouse antibody

(G) = Goat antibody

(R) = Rabbit Antibody

| R | R | R | R | R | R | R | R  | R  |
|---|---|---|---|---|---|---|----|----|
| 3 | 4 | 5 | 6 | 7 | 8 | 9 | 10 | 11 |

**X14.3.3\_ze X4E.BP1.R X4E.BP1\_r X4E.BP1\_r X53BP1.R. A.Raf.R.V\_ ACC\_pS79 ACC1.R.E\_ ACVRL1.R**  
**Normalizer Normalizer Normalizer Normalizer Normalizer Normalizer Normalizer Normalizer Normalizer**  
 3.1641297 0.6879588 1.5347348 4.1641767 0.5086773 0.7197427 1.0243605 2.5740524 0.4582018  
 3.2909882 0.6618655 1.5081429 4.4111711 0.4440197 0.6740723 0.9285382 2.7156933 0.4243531  
 2.8947406 0.7767467 1.5178572 4.5502501 0.5345715 0.7860596 0.9777679 2.8974888 0.4597935  
 2.6872093 0.7425408 1.5579654 4.9730283 0.5447594 0.7428273 1.087239 3.3668366 0.4404644  
 2.591327 0.4434593 0.7773534 2.1654119 0.6445442 0.8174918 0.8473199 1.8083427 0.4500276  
 3.0602967 0.442277 0.7565276 2.4267804 0.7737961 0.8614404 0.9058972 2.108585 0.4446845  
 2.5837416 0.4483442 0.766908 2.0805093 0.8112292 0.835172 0.8281152 1.7638388 0.438608  
 2.6967314 0.4282578 0.8189059 2.1948281 0.6292494 0.859838 0.8326575 1.7985733 0.4305095

| M  | R  | R  | R  | R  | R  | M  | M  | R  |
|----|----|----|----|----|----|----|----|----|
| 12 | 13 | 14 | 15 | 16 | 17 | 18 | 19 | 20 |

**ADAR1.M. Akt.R.V\_GI Akt\_pS473 Akt\_pT308 AMPK\_alp AMPK\_pT1 Annexin\_I. Annexin\_V AR.R.V\_GE**  
**Normalized Normalized Normalized Normalized Normalized Normalized Normalized Normalized Normalized**  
 0.457694 7.2844466 0.174908 0.2995557 1.4681502 0.6246833 0.8569184 0.3951854 0.6242597  
 0.4716202 7.7665767 0.17014 0.2698238 1.370281 0.6974124 0.8681202 0.363473 0.5936391  
 0.484662 7.0277705 0.2060216 0.2986327 1.2664762 0.7144686 0.8653281 0.4611673 0.6169292  
 0.4670452 7.6757765 0.1810977 0.2748085 1.2944726 0.6558332 0.9006374 0.3898618 0.6244839  
 0.5168807 8.1416341 0.4746778 0.3245527 1.6191957 0.9749535 0.5182992 0.46503 0.9268308  
 0.5130008 10.046284 0.4148165 0.3252574 1.8135575 0.983237 0.5033049 0.4722361 0.8578194  
 0.5026127 7.2845863 0.4187533 0.3142249 1.7320715 1.0445038 0.5204513 0.4450013 0.8542548  
 0.5326703 7.8715016 0.4486443 0.3222985 1.7849498 1.0798047 0.5511102 0.4480358 0.9113151

| M  | R  | R  | M  | M  | R  | R  | R  | M  |
|----|----|----|----|----|----|----|----|----|
| 21 | 22 | 23 | 24 | 25 | 26 | 27 | 28 | 29 |

**ARHI.M.C\_** **ATM.R.V\_** **ATM\_pS19** **ATP5H.M.C** **B.Raf.M.C\_** **B.Raf\_pS4** **Bad\_pS11** **Bak.R.C\_G** **BAP1.M.V\_**  
**Normalizer** **Normalizer** **Normalizer** **Normalizer** **Normalizer** **Normalizer** **Normalizer** **Normalizer** **Normalizer**  
0.3811787 1.598986 0.23817 0.5704022 4.8440897 1.1111342 1.0815959 0.91161 0.4408919  
0.3272344 1.639819 0.2260026 0.5584022 4.994907 1.0298801 1.0545438 1.0317526 0.472857  
0.3278647 1.6229662 0.246682 0.6018778 4.4388288 1.1164989 1.0289898 0.980442 0.4571533  
0.3310395 1.6652948 0.2432066 0.6286232 5.3961939 1.1251581 1.0189969 0.9601442 0.4279591  
0.4054284 1.8278553 0.3244856 0.7477897 2.7456413 1.0376776 0.9939004 0.9501681 0.4562858  
0.3808506 1.8403568 0.3321921 0.7732369 3.5760246 1.109202 0.9140196 0.9031193 0.4575427  
0.3754454 1.7274776 0.3401482 0.7508789 2.9731613 1.0130309 0.962795 0.8707217 0.4696657  
0.3895748 1.8869723 0.3382902 0.7994193 3.1033823 1.0470651 1.0677718 0.9481501 0.4814641

|    |    |    |    |    |    |    |    |    |
|----|----|----|----|----|----|----|----|----|
| R  | M  | R  | G  | R  | R  | R  | R  | R  |
| 30 | 31 | 32 | 33 | 34 | 35 | 36 | 37 | 38 |

**Bax.R.V\_G Bcl.2.M.V\_ Bcl.xL.R.V Beclin.G.C beta.Caten beta.Caten Bid.R.C\_G Bim.R.V\_G BRCA2.R.C**  
**Normalizer Normalizer Normalizer Normalizer Normalizer Normalizer Normalizer Normalizer Normalizer**  
 1.0704422 0.2873138 1.2169403 0.9033921 0.9553594 0.5052624 0.951497 0.9227525 0.2435065  
 1.0865487 0.2647784 1.2251839 0.8369216 1.0007291 0.4682703 0.92137 0.8642469 0.3041677  
 1.2101671 0.3165707 1.1748113 0.9295789 1.0211371 0.4909586 0.8931429 0.8939134 0.2868179  
 1.1883053 0.3003156 1.2210143 0.9374388 1.034663 0.5011869 0.9085724 0.8323458 0.2647899  
 1.2830164 0.4623826 1.1035352 0.9021039 1.0487739 0.5596185 0.8900443 0.9029861 0.3271083  
 1.4385793 0.4448549 1.2504388 0.9011836 1.1086026 0.563003 0.8796797 0.9493351 0.3190126  
 1.2583096 0.4413615 1.1969105 0.8392914 1.0808344 0.5567867 0.884099 0.9460198 0.3032486  
 1.3114901 0.4438422 1.2957059 0.8224891 1.1178634 0.6140395 0.9070324 0.9448049 0.3039198

|    |    |    |    |    |    |    |    |    |
|----|----|----|----|----|----|----|----|----|
| R  | R  | M  | R  | R  | R  | R  | R  | M  |
| 39 | 40 | 41 | 42 | 43 | 44 | 45 | 46 | 47 |

**c.Jun\_pS7** **c.Kit.R.V\_C** **c.Met.M.Q** **c.Met\_pY1** **c.Myc.R.C\_C** **Raf.R.V\_C** **Raf\_pS3** **Caspase.7** **Caspase.8**  
**Normalizer** **Normalizer** **Normalizer** **Normalizer** **Normalizer** **Normalizer** **Normalizer** **Normalizer** **Normalizer**  
0.5333167 0.4313542 0.3909761 0.6035528 0.8030742 1.5901149 0.4322031 0.2868405 0.9994134  
0.4878709 0.4133108 0.3685557 0.6182511 0.607116 1.6174699 0.4106473 0.2646327 0.8820719  
0.5477699 0.421735 0.3256213 0.6329135 0.6597083 1.5255628 0.4637201 0.3060445 0.9157545  
0.5276389 0.4198126 0.3958281 0.5898652 0.5905063 1.5879837 0.4433253 0.2854392 0.9221871  
0.5663558 0.4596501 0.467504 0.6535348 0.5886432 0.8126055 0.4721052 0.3083951 0.8465977  
0.5575268 0.4589567 0.4782706 0.6289808 0.5137259 0.8075936 0.4562979 0.3093881 0.8144875  
0.5592852 0.4661732 0.4669266 0.6766797 0.6671543 0.8032254 0.4453191 0.3207791 0.7943268  
0.5944461 0.4833239 0.4740604 0.6930755 0.7804814 0.8428735 0.4948988 0.3098747 0.8229555

|    |    |    |    |    |    |    |    |    |
|----|----|----|----|----|----|----|----|----|
| R  | M  | M  | M  | R  | R  | M  | R  | M  |
| 48 | 49 | 50 | 51 | 52 | 53 | 54 | 55 | 56 |

**Caveolin.1** **CD29.M.V\_** **CD31.M.V\_** **CD49b.M.V** **CDK1.R.V\_** **CDKN2A\_** **Chk1.M.C\_** **Chk1\_pS3\_** **Chk2.M.V\_**  
**Normalized** **Normalized** **Normalized** **Normalized** **Normalized** **Normalized** **Normalized** **Normalized** **Normalized**  
0.2550627 0.2540121 0.3038996 0.5697192 0.5988645 1.3008676 1.3174829 0.4414269 0.937992  
0.2146825 0.2159046 0.2858842 0.5082017 0.5521038 1.2517599 1.5768448 0.4375959 0.9598208  
0.2426182 0.2389858 0.3715038 0.5594255 0.6059665 1.2132038 1.387094 0.4555268 1.0539359  
0.2203316 0.2243433 0.328521 0.5341954 0.5907291 1.2492855 1.529961 0.4259093 1.0615219  
0.2933671 0.380127 0.3886069 0.6888933 0.5397314 0.6818228 0.7947018 0.4146306 0.7317945  
0.2759035 0.3583349 0.3926203 0.6919378 0.5404387 0.5689732 0.8193876 0.4106206 0.7867014  
0.2791257 0.3427891 0.3770839 0.7015829 0.5745028 0.6539613 0.7874487 0.4156469 0.7388465  
0.275983 0.3519831 0.3938467 0.7165452 0.6233884 0.6734937 0.8416412 0.4388137 0.7168903



|    |    |    |    |    |    |    |    |    |
|----|----|----|----|----|----|----|----|----|
| R  | R  | R  | R  | M  | R  | M  | R  | R  |
| 57 | 58 | 59 | 60 | 61 | 62 | 63 | 64 | 65 |

**Chk2\_pT6** **clAP.R.C\_** **Claudin.7.I** **Collagen\_** **Complex\_I** **Cox.2.R.C\_** **Cox\_IV.M.C** **Cyclin\_B1.** **Cyclin\_D1.**  
**Normalized** **Normalized** **Normalized** **Normalized** **Normalized** **Normalized** **Normalized** **Normalized** **Normalized**  
0.2805038 1.5556231 0.4203456 0.5196576 2.060221 0.4079759 0.7105459 1.3115729 0.7060835  
0.2653815 1.4357453 0.3816633 0.5536954 1.9755272 0.3947105 0.7267124 1.1839472 0.6949477  
0.2749616 1.353152 0.3315268 0.5492331 1.8681229 0.3855724 0.6570297 1.3138967 0.6979902  
0.2710845 1.4151491 0.3295608 0.5411795 2.0194685 0.4283836 0.67474 1.3609581 0.6706709  
0.3064595 1.3665994 0.4041798 0.6487977 1.6746295 0.5045019 0.6961597 0.2923324 0.6807735  
0.2915367 1.4812422 0.3920906 0.60839 1.9252393 0.5218345 0.7213547 0.3368848 0.6846261  
0.2764201 1.2920301 0.3591346 0.6843038 1.8421655 0.5134795 0.6969669 0.3346793 0.7012545  
0.288091 1.3185567 0.3807246 0.7316135 1.9662585 0.5064816 0.7653743 0.3152542 0.6800332

|    |    |    |    |    |    |    |    |    |
|----|----|----|----|----|----|----|----|----|
| M  | M  | R  | R  | R  | M  | R  | R  | R  |
| 66 | 67 | 68 | 69 | 70 | 71 | 72 | 73 | 74 |

**Cyclin\_E1** **Cyclophilin** **DJ.1.R.V\_C** **Dvl3.R.V\_C** **E.Cadherin** **E2F1.M.V\_e** **EF2.R.C\_e** **EF2K.R.V** **EGFR.R.V\_**  
**Normalized** **Normalized** **Normalized** **Normalized** **Normalized** **Normalized** **Normalized** **Normalized** **Normalized**  
0.7400604 7.2439252 1.1562637 0.6908512 0.2154384 0.267309 2.4677413 0.8930928 0.7470035  
0.7156448 7.3734698 1.1028808 0.7930893 0.1975713 0.2419885 2.3487681 1.4546035 0.6846789  
0.7845129 6.8137209 1.2022222 0.675801 0.215356 0.2195971 2.3226848 0.9066194 0.6464159  
0.8036419 7.9370818 1.1246071 0.7079717 0.1816373 0.2366473 2.402577 0.8524191 0.6420512  
0.607459 6.6065662 1.3963216 0.67834 0.2485309 0.3089266 1.2967938 1.2595423 0.6581971  
0.6253342 7.626116 1.4954381 0.7000544 0.2403537 0.3094558 1.3643892 1.3616897 0.6639694  
0.5924465 5.6636303 1.3903373 0.6837031 0.2344767 0.3137279 1.2570854 1.2954858 0.5907381  
0.6070835 7.0198766 1.3814781 0.6985364 0.2354147 0.3172527 1.2671595 1.2512338 0.6317253

|    |    |    |    |    |    |    |    |    |
|----|----|----|----|----|----|----|----|----|
| R  | R  | R  | R  | R  | R  | M  | R  | R  |
| 75 | 76 | 77 | 78 | 79 | 80 | 81 | 82 | 83 |

**EGFR\_pY1** **EGFR\_pY1** **eIF4E.R.V\_** **eIF4G.R.C\_** **ER.alpha.F** **ER.alpha\_** **ERCC1.M.(** **ETS.1.R.V\_** **FAK..R.E\_**  
**Normalized** **Normalized** **Normalized** **Normalized** **Normalized** **Normalized** **Normalized** **Normalized** **Normalized**  
0.1091774 0.3080943 0.9384466 4.2366001 0.0688969 0.2423107 0.4045665 0.7712656 1.5082522  
0.099852 0.3208376 0.8652658 9.8149233 0.063166 0.2451811 0.3615032 0.7405699 1.4914748  
0.1275233 0.3435834 0.9209576 4.3143143 0.063337 0.2430085 0.4356808 0.7341398 1.6008022  
0.1029747 0.3133476 0.8926898 4.9181955 0.0627745 0.2370223 0.4351599 0.7057959 1.6596642  
0.1513548 0.3297089 0.6818908 3.6715802 0.0994212 0.2563367 0.471775 0.7548136 1.5623852  
0.1395216 0.3165116 0.7166284 4.2012093 0.0931547 0.2369503 0.4659565 0.7622804 1.7039114  
0.1430273 0.3150954 0.6791756 3.4871392 0.0924873 0.2483533 0.4419069 0.7445098 1.5435131  
0.1322656 0.3186797 0.6671037 3.4308147 0.0921976 0.2523323 0.4514482 0.7705626 1.5772254

|    |    |    |    |    |    |    |    |    |
|----|----|----|----|----|----|----|----|----|
| R  | R  | R  | R  | R  | R  | R  | R  | M  |
| 84 | 85 | 86 | 87 | 88 | 89 | 90 | 91 | 92 |

**FAK\_pY39** **FASN.R.V\_** **FGFR\_pY6** **Fibronectin** **FOXO3a.R.** **FoxM1.R.V** **FOXO3a\_p** **FRS2.alpha** **G6PD.M.V\_**  
**Normalized** **Normalized** **Normalized** **Normalized** **Normalized** **Normalized** **Normalized** **Normalized** **Normalized**  
0.1487029 4.2322066 0.2468674 0.3192141 0.2341646 0.9613222 0.5164711 0.1997983 1.0311837  
0.1336482 4.143472 0.2409773 0.3148985 0.2260837 0.9957017 0.4939722 0.1899587 0.9911712  
0.1614914 3.9862159 0.2696286 0.3497824 0.2253687 0.9662963 0.5092558 0.2269511 0.9537126  
0.1610749 4.3823175 0.2430749 0.3128326 0.2101849 0.9765037 0.500835 0.2083522 1.0469712  
0.228934 1.4989 0.337206 0.4924096 0.3039125 0.3644484 0.4822393 0.3241704 0.7868451  
0.2333221 1.7482595 0.3365259 0.4578693 0.2963094 0.3676155 0.4876039 0.3185185 0.8011089  
0.2241313 1.539896 0.3266476 0.4488616 0.2945576 0.3582688 0.500693 0.3107237 0.7745847  
0.2229422 1.5309139 0.3206625 0.4936212 0.2998769 0.3616554 0.4924818 0.3121612 0.7551559

|    |    |    |    |    |    |    |     |     |
|----|----|----|----|----|----|----|-----|-----|
| R  | M  | M  | R  | R  | M  | R  | R   | R   |
| 93 | 94 | 95 | 96 | 97 | 98 | 99 | 100 | 101 |

**Gab2.R.V\_ GAPDH.M. GATA3.M.\ GCN5L2.R. GPBB.R.V\_ GSK3.alph GSK3.alph GSK3\_pS9 GYS.R.V\_C**  
**Normalizer Normalizer Normalizer Normalizer Normalizer Normalizer Normalizer Normalizer Normalizer**  
 5.3795367 3.7939621 0.563105 0.5363439 4.440897 1.1637702 0.255483 0.5619118 4.6632812  
 8.5455827 4.1649193 0.7642737 0.4937583 4.2506398 1.1313643 0.2612248 0.5895934 5.3628642  
 5.1313362 2.6924289 0.7660027 0.4591304 4.304962 1.133947 0.2894558 0.552753 4.7359228  
 5.6920369 3.41662 0.852078 0.5292814 4.7496497 1.1674009 0.2684795 0.5353837 5.338536  
 6.7126466 0.9521612 0.8503705 0.6482548 3.2423963 1.2081581 0.3472063 0.7127219 7.6425551  
 8.8107399 1.0470093 0.9140195 0.537656 3.9617617 1.2991115 0.3033941 0.5965913 9.5191435  
 7.6577899 0.8781927 0.8702642 0.5598578 3.0112519 1.1305307 0.2981315 0.5940888 7.7758743  
 7.7166126 0.7977243 0.9149198 0.6443793 3.1813742 1.1469074 0.3526798 0.7715279 8.3800635

|     |     |     |     |     |     |     |     |     |
|-----|-----|-----|-----|-----|-----|-----|-----|-----|
| R   | M   | R   | R   | R   | R   | R   | R   | R   |
| 102 | 103 | 104 | 105 | 106 | 107 | 108 | 109 | 110 |

**GYS\_pS64** **HER2.M.V\_** **HER2\_pY1** **HER3.R.V\_** **HER3\_pY1** **Heregulin.l** **Histone.H3** **IGF1R.R.V\_** **IGFBP2.R.**  
**Normalized** **Normalized** **Normalized** **Normalized** **Normalized** **Normalized** **Normalized** **Normalized** **Normalized**  
0.8873853 0.9045996 0.279823 2.0126861 0.5863947 0.3208799 0.7647277 1.3487818 5.3873535  
0.9424639 0.9150562 0.2519768 2.4105112 0.5419339 0.3039155 0.6114507 1.3399347 5.441699  
0.7861099 1.0468746 0.2618029 2.0264105 0.588774 0.326142 0.6360327 1.3379322 4.3622123  
0.7983191 1.0372038 0.2423171 2.2350293 0.5076801 0.3064183 0.5887122 1.3871212 5.2618744  
0.7345554 1.0313554 0.3130256 1.9235999 0.6526455 0.3515281 0.5584693 1.0248479 1.4230562  
0.6628892 1.1778577 0.3041205 2.187264 0.6165371 0.3416931 0.6169306 1.0965524 1.4960052  
0.6648325 1.1859906 0.2994155 2.0538299 0.6485224 0.4006175 0.5669987 1.0336779 1.4494739  
0.7801345 1.2837877 0.3042828 2.1470503 0.6809823 0.335839 0.5906574 1.0255659 1.5215849

| R   | R   | R   | R   | R   | R   | R   | R   | R   |
|-----|-----|-----|-----|-----|-----|-----|-----|-----|
| 111 | 112 | 113 | 114 | 115 | 116 | 117 | 118 | 119 |

**INPP4B.R. IRS1.R.V\_ (JNK\_pT18: JNK2.R.C\_ Lck.R.V\_ G MAPK\_pT2 Mcl.1.R.V\_ MDM2\_pS MEK1.R.V\_**  
**Normalized Normalized Normalized Normalized Normalized Normalized Normalized Normalized Normalized**  
 0.5634769 1.0965481 0.5004522 1.1432112 0.4865227 0.5484116 0.4055145 1.1828749 3.265458  
 0.500112 1.219939 0.4666267 1.0900838 0.5276253 0.778611 0.3901825 1.3940915 3.4150443  
 0.5347532 1.0966544 0.4884609 1.0644266 0.5155731 0.5608395 0.4538082 1.1971079 3.2950854  
 0.5105552 1.0305654 0.4539637 1.0775913 0.4995327 0.5414454 0.4251138 1.1750891 3.4877252  
 0.5605507 1.0330416 0.4859245 1.1026947 0.5462805 3.8917875 0.4825381 0.7507218 1.8847278  
 0.5419626 1.0495072 0.5047314 1.1993354 0.4617532 1.1339908 0.4869369 0.7243123 2.1355086  
 0.5486329 1.0081362 0.4763945 1.1232523 0.4894488 1.5843798 0.4663729 0.7165011 1.9367743  
 0.5391878 1.0742927 0.4829562 1.0965654 0.5386476 1.5558913 0.4736927 0.7393669 1.9209448

| R   | R   | M   | M   | R   | R   | R   | R   | R   |
|-----|-----|-----|-----|-----|-----|-----|-----|-----|
| 120 | 121 | 122 | 123 | 124 | 125 | 126 | 127 | 128 |

**MEK1\_pS2** **MEK2.R.V\_** **MIG.6.M.V\_** **MSH2.M.V\_** **MSH6.R.C\_** **mTOR.R.V\_** **mTOR\_pS** **MYH11.R.V** **Myosin.IIa\_**  
**Normalized** **Normalized** **Normalized** **Normalized** **Normalized** **Normalized** **Normalized** **Normalized** **Normalized**  
1.9543564 0.4889267 1.6482228 1.3109671 7.1363064 1.8360446 0.7850762 1.0032051 1.8861742  
2.0976704 0.4727378 1.8061358 1.2521872 8.8720218 1.8069702 0.7621731 0.9351867 1.7069739  
2.1368445 0.496013 1.7597431 1.4913396 7.8621817 1.7742634 0.7643023 0.9500469 1.1962103  
2.278364 0.4264941 1.7488287 1.6562128 9.1287988 1.9621459 0.7804698 0.963057 1.4149242  
1.3220837 0.5502131 1.3929079 1.0253923 5.1744135 2.7404573 0.9837662 1.0734944 1.0340933  
1.2662164 0.5709405 1.4656184 1.0050914 6.4906535 3.1926546 0.9344226 1.0045859 1.0754642  
1.304122 0.5385952 1.3613524 0.9958101 5.0320619 2.7397977 0.9252103 1.0428326 1.0168994  
1.1448867 0.553775 1.416785 1.0073594 4.9053447 2.7964101 0.9529773 1.028992 0.8674878



|     |     |     |     |     |     |     |     |     |
|-----|-----|-----|-----|-----|-----|-----|-----|-----|
| R   | M   | R   | R   | R   | R   | R   | R   | R   |
| 129 | 130 | 131 | 132 | 133 | 134 | 135 | 136 | 137 |

**N.Cadherin** **N.Ras.M.V** **Napsin.R.C** **NDRG1\_p** **TNF.kB.p65** **NF2.R.C\_G** **Notch1.R.** **p21.R.V\_G** **p27.R.V\_G**  
**Normalized** **Normalized** **Normalized** **Normalized** **Normalized** **Normalized** **Normalized** **Normalized** **Normalized**  
0.5181485 0.3370351 0.3601541 0.6779061 1.1663282 1.1543027 0.4658572 2.3109944 0.3949812  
0.4850499 0.3449538 0.3610469 0.6588648 1.2830458 1.134367 0.4882277 1.9968 0.39456  
0.5538093 0.4185004 0.3546527 0.7253074 1.1978659 1.1094581 0.4326822 2.1299329 0.394593  
0.5187083 0.3898919 0.3852139 0.6922097 1.1578092 1.1388146 0.410251 2.1447227 0.3747483  
0.575584 0.4438146 0.4450685 1.1447017 0.8244281 1.2820851 0.5246072 0.9309517 0.5159303  
0.5467067 0.4384291 0.3926702 1.2160286 0.8286207 1.2780974 0.5217516 0.880102 0.5122358  
0.5584993 0.4240654 0.4114424 1.1819255 0.7946752 1.2213635 0.4991382 0.880221 0.4743315  
0.5946262 0.4134321 0.4357683 1.149133 0.8663553 1.2325008 0.514715 0.9762628 0.4728088

|     |     |     |     |     |     |     |     |     |
|-----|-----|-----|-----|-----|-----|-----|-----|-----|
| R   | R   | M   | R   | R   | R   | R   | R   | R   |
| 138 | 139 | 140 | 141 | 142 | 143 | 144 | 145 | 146 |

**p27\_pT157** **p27\_pT198** **p38.alpha.l** **p38\_MAPK** **p38\_pT180** **p53.R.C\_G** **p70S6K.R.** **p70S6K\_p** **p90RSK.R.**  
**Normalizer** **Normalizer** **Normalizer** **Normalizer** **Normalizer** **Normalizer** **Normalizer** **Normalizer** **Normalizer**  
0.4811897 0.5533848 0.57774 1.8545236 0.4336752 0.3745905 0.872164 0.4921293 0.6527144  
0.5193758 0.5978862 0.5597235 1.7379011 0.4389585 0.3611762 0.8052955 0.4830651 0.8337542  
0.4895606 0.5659887 0.621316 1.7717494 0.4657229 0.4176027 0.8363996 0.4823815 0.891858  
0.452631 0.5303255 0.6030264 1.8191133 0.4292823 0.3841748 0.7956561 0.4539102 0.9133248  
0.5294628 0.6470394 0.6073494 1.6120428 0.4603518 0.4712414 0.8650442 0.4906953 0.7568332  
0.5046787 0.6222232 0.6234748 1.721441 0.4390068 0.4758277 0.8550068 0.4775723 0.7867472  
0.4800666 0.6317925 0.586918 1.5098876 0.4324112 0.4569614 0.7810944 0.4628934 0.7242921  
0.4835745 0.6674037 0.5928087 1.4651733 0.4487114 0.4782855 0.8012842 0.4909604 0.7165323

|     |     |     |     |     |     |     |     |     |
|-----|-----|-----|-----|-----|-----|-----|-----|-----|
| R   | M   | M   | R   | M   | G   | R   | R   | R   |
| 147 | 148 | 149 | 150 | 151 | 152 | 153 | 154 | 155 |

p90RSK\_p PAI.1.M.V\_ PARP\_clea Paxillin.R.( PCNA.M.C. PDCD1L1.( PDCD4.R.( PDGFR\_be PDK1.R.V\_  
 Normalizer Normalizer Normalizer Normalizer Normalizer Normalizer Normalizer Normalizer Normalizer  
 0.3240025 0.3627739 0.3805771 4.1083394 0.5925188 0.505441 6.6779641 0.3434558 0.9207366  
 0.3286051 0.3430802 0.3895827 4.163429 0.5948281 0.5085781 6.7762133 0.3351669 0.8824113  
 0.3413669 0.3716067 0.4026014 3.7476536 0.5338611 0.5457146 6.5689482 0.3571318 0.9346091  
 0.3467383 0.3729105 0.3998532 4.0834877 0.5660094 0.4748763 7.2815684 0.3168071 0.8983718  
 0.2511794 0.3901875 0.4219723 2.2499104 0.4601354 0.6025 4.8215815 0.4025705 0.895509  
 0.2363478 0.3800817 0.426917 2.9728933 0.4514403 0.6171059 5.3024563 0.385205 0.9492736  
 0.2322669 0.354348 0.4234272 2.5344897 0.424014 0.6105577 4.8329371 0.3634245 0.9175999  
 0.2407165 0.3948363 0.4266449 2.5979681 0.4298502 0.6758529 4.8774293 0.3597291 0.9573424

|     |     |     |     |     |     |     |     |     |
|-----|-----|-----|-----|-----|-----|-----|-----|-----|
| R   | R   | R   | R   | R   | M   | R   | R   | R   |
| 156 | 157 | 158 | 159 | 160 | 161 | 162 | 163 | 164 |

**PDK1\_pS2** **PEA15.R.V** **PEA15\_pS** **PI3K.p110.** **PI3K.p85.R** **PKC.alpha** **PKC.alpha** **PKC.delta\_** **PKC.pan\_E**  
**Normalized** **Normalized** **Normalized** **Normalized** **Normalized** **Normalized** **Normalized** **Normalized** **Normalized**  
0.9538336 1.248493 0.8410836 1.0191823 2.7806583 0.6141381 0.4653758 0.5300721 2.455743  
0.8851616 1.1470013 1.1437727 0.9967573 2.8945159 0.5806948 0.4495223 0.537999 3.152263  
0.9473215 1.2233787 0.9902651 1.0398595 2.3839105 0.6271865 0.5508954 0.5635359 2.4503694  
0.8857947 1.255758 1.009654 1.0247878 2.6440796 0.6102203 0.5051024 0.5425946 2.7892983  
0.9768365 1.5487439 0.9865983 0.8333066 2.1864768 0.7633864 0.6827464 0.5679619 2.1804848  
0.9698864 1.738798 0.949951 0.8655602 2.2238181 0.7925103 0.7249625 0.5715231 2.3185697  
0.9174768 1.6669226 0.9503744 0.8235794 2.0766196 0.7501125 0.6983182 0.5667849 2.2009897  
0.9425289 1.6551033 0.9818929 0.8341875 2.1553482 0.7530803 0.6879548 0.6019331 2.2778517

|     |     |     |     |     |     |     |     |     |
|-----|-----|-----|-----|-----|-----|-----|-----|-----|
| R   | M   | R   | R   | R   | R   | R   | R   | M   |
| 165 | 166 | 167 | 168 | 169 | 170 | 171 | 172 | 173 |

**PMS2.R.V\_ Porin.M.V\_ PR.R.V\_GE PRAS40\_p PREX1.R.V PTEN.R.V\_ Rab11.R.E\_ Rab25.R.V\_ Rad50.M.V**  
**Normalizer Normalizer Normalizer Normalizer Normalizer Normalizer Normalizer Normalizer Normalizer**  
 2.8540383 0.3584349 0.4084532 0.8676687 1.9374965 1.1691677 0.4313682 0.2167763 0.8470942  
 4.7176418 0.3296805 0.3870341 0.9406952 1.8922049 1.1103013 0.3925157 0.1972647 0.7858177  
 3.2549004 0.3681032 0.3930113 0.8751533 2.1085845 1.1207646 0.4258533 0.2109965 0.9364266  
 3.7071627 0.372571 0.3973321 0.841994 2.3339515 1.1289185 0.3855737 0.1965917 0.9595871  
 4.1864217 0.4831803 0.4508499 0.8115194 1.8224794 3.6988649 0.3894739 0.2531885 1.1788523  
 4.0986291 0.4599454 0.4370792 0.7548311 2.2129208 4.4218315 0.3838698 0.2420051 1.1476324  
 3.3552249 0.4504616 0.4287929 0.7529551 1.9184022 3.8539279 0.4020924 0.2382663 1.16211  
 3.7050101 0.4935346 0.4460641 0.8616163 1.9126815 3.9947613 0.4017122 0.2460384 1.2920384

|     |     |     |     |     |     |     |     |     |
|-----|-----|-----|-----|-----|-----|-----|-----|-----|
| R   | R   | M   | R   | R   | R   | R   | R   | R   |
| 174 | 175 | 176 | 177 | 178 | 179 | 180 | 181 | 182 |

Rad51.R.V Raptor.R.V Rb.M.QC\_(Rb\_pS807\_RBM15.R.\ Rictor.R.C\_ Rictor\_pT1S6\_pS235\_S6\_pS240\_ Normalizer Normalizer Normalizer Normalizer Normalizer Normalizer Normalizer Normalizer Normalizer  
0.1244133 1.207226 0.640267 1.6976988 2.0153629 1.0799817 0.8953099 2.2660652 1.0635367  
0.1103767 1.2140845 0.6171922 1.7482619 2.3518872 1.4042404 0.8831526 1.9772228 0.9172602  
0.1173315 1.2578639 0.6519481 1.6196992 1.807773 1.0621357 0.9304241 2.5200979 1.0284628  
0.1128467 1.2860391 0.6302109 1.8552873 2.1917992 1.0533099 0.9120223 2.6991632 1.0523443  
0.1379271 2.0013986 0.5642244 0.5290812 1.3724058 1.0747836 0.8301849 0.4945736 0.651623  
0.134178 2.1856684 0.5899312 0.5371042 1.3543983 1.1645636 0.7817952 0.462859 0.6115651  
0.1323877 1.9323405 0.5937904 0.5259142 1.4015505 1.1368056 0.7558171 0.4482705 0.5611005  
0.1284126 1.9067435 0.6038101 0.5603127 2.0331775 1.117882 0.79029 0.493381 0.5882228

| M   | M   | R   | M   | R   | M   | R   | R   | M   |
|-----|-----|-----|-----|-----|-----|-----|-----|-----|
| 183 | 184 | 185 | 186 | 187 | 188 | 189 | 190 | 191 |

**SCD1.M.V\_ SDHA.M.V\_ SETD2.R.C SF2.M.V\_ G Shc\_pY317 Smac.M.Q( Smad1.R.V Smad3.R.V Smad4.M.V**  
**Normalizer Normalizer Normalizer Normalizer Normalizer Normalizer Normalizer Normalizer Normalizer**  
 0.3937141 7.1727381 0.3373575 0.3624831 0.3192408 0.9446557 1.3897063 0.8412315 0.5708277  
 0.3806087 8.034257 0.3161408 0.343642 0.3310242 0.9044893 1.3635182 0.9430238 0.5769423  
 0.3977863 6.8638923 0.3371131 0.3696763 0.3524068 1.016995 1.3544891 0.8443013 0.5823966  
 0.4195349 7.6344618 0.3292199 0.3625834 0.3188865 1.0232439 1.3327053 0.8309012 0.5726216  
 0.4090259 5.6056063 0.3599863 0.3825159 0.3790838 1.377189 1.310528 0.8262905 0.6891629  
 0.3984217 6.6129955 0.3723391 0.3787357 0.3667807 1.4208089 1.3083977 0.7751046 0.702245  
 0.3862172 5.1152262 0.3571873 0.3687733 0.3635082 1.3418346 1.1345217 0.8234955 0.6943743  
 0.4086982 6.4568889 0.3650703 0.3526997 0.3762108 1.3349234 1.2410871 0.868451 0.6718847

| M   | M   | R   | R   | R   | R   | R   | M   | R   |
|-----|-----|-----|-----|-----|-----|-----|-----|-----|
| 192 | 193 | 194 | 195 | 196 | 197 | 198 | 199 | 200 |

**Snail.M.QC Src.M.V\_G Src\_pY416 Src\_pY527 STAT3\_pY STAT5.alpha Stathmin.F Syk.M.V\_G TAZ.R.V\_G**  
**Normalizer Normalizer Normalizer Normalizer Normalizer Normalizer Normalizer Normalizer Normalizer**  
 0.6577553 0.6198958 0.5393574 0.8861913 0.4978368 0.4985759 0.6867528 0.4138351 1.0235574  
 0.624006 0.544118 0.6045992 0.7954904 0.4650976 0.4108838 0.6954588 0.3778454 1.059254  
 0.6766752 0.5284748 0.5292361 0.7090724 0.4096274 0.4509453 0.7473029 0.4046883 1.0490517  
 0.6520718 0.6597151 0.4874615 0.6197086 0.3977837 0.4183907 0.7688318 0.3729201 1.055891  
 0.5475608 0.6907898 1.100855 0.9304556 0.5138391 0.6978475 0.7227449 0.4488944 1.1712836  
 0.5213588 0.6179612 0.7516179 0.8793255 0.4672895 0.6899993 0.7339576 0.4297253 1.1736877  
 0.5223977 0.6134286 0.7254831 0.853576 0.465602 0.6745071 0.7001973 0.416581 1.1051651  
 0.5279628 0.6443547 0.8141584 0.8766635 0.5011767 0.6938267 0.6879962 0.4492398 1.1717998



| R   | R   | M   | R   | R   | R   | R   | R   | R   |
|-----|-----|-----|-----|-----|-----|-----|-----|-----|
| 201 | 202 | 203 | 204 | 205 | 206 | 207 | 208 | 209 |

**TFRC.R.V\_ TIGAR.R.V Transgluta TSC1.R.C\_ TTF1.R.V\_ (Tuberin.R.) Tuberin\_p1 TYRO3.R.\ UBAC1.R.\**  
**Normalized Normalized Normalized Normalized Normalized Normalized Normalized Normalized Normalized**  
 9.2186953 1.9679843 0.5993801 2.3992686 1.0768825 1.9152221 0.3634925 1.7016312 1.183896  
 11.839936 1.8069693 0.6318099 2.3577336 0.9592937 2.0344629 0.3112793 1.6452037 1.0615996  
 8.2149449 1.7313953 0.6819328 2.4560884 1.0321281 2.023534 0.3268315 1.6647923 1.0507127  
 9.8838902 1.6925743 0.6774004 2.6430955 1.0573836 2.1974228 0.3088148 1.7033588 1.2065408  
 6.4641673 1.5822308 0.8861394 3.1922399 0.5483388 3.4321594 0.3838258 0.7538226 1.0668509  
 7.184613 1.7204988 0.83384 3.8193225 0.5373617 3.9711147 0.3598694 1.0415856 1.0742542  
 5.7070625 1.5215009 0.7607303 3.2328714 0.5463615 3.3423067 0.3468611 1.0295136 0.9924997  
 5.7370555 1.5493463 0.7577104 3.432683 0.5484426 3.3970612 0.3578883 1.0752105 1.0258346

| M   | M   | R   | R   | R   | R   | R   | R   |
|-----|-----|-----|-----|-----|-----|-----|-----|
| 210 | 211 | 212 | 213 | 214 | 215 | 216 | 217 |

UGT1A.M.\ UQCRC2.M VEGFR2.R XRCC1.R.EYAP.R.E\_G YAP\_pS12' YB.1.R.V\_GBL.10 YB.1\_pS102.R.V\_(  
 Normalizer Normalizer Normalizer Normalizer Normalizer Normalizer Normalized Linea Normalized Linear  
 0.5918688 0.5462186 1.482772 0.5225759 0.4168703 1.376941 0.453603752 1.881578027  
 0.6180752 0.5471549 1.6679331 0.4630173 0.4090347 1.5548754 0.47008854 2.005825455  
 0.6164202 0.4836127 1.6978071 0.5041697 0.4443027 1.4757342 0.468493884 1.839345364  
 0.6221282 0.4484142 1.7443427 0.5014081 0.4210423 1.4994949 0.514662351 1.858278881  
 0.6382795 0.558103 1.4481231 0.5064755 0.5375573 2.1782641 0.435457066 0.918492501  
 0.6555985 0.5575354 1.6694293 0.4867529 0.5176261 2.6245329 0.427670131 0.90958136  
 0.6342628 0.5310798 1.4736625 0.4820721 0.5140005 2.1625965 0.477970763 0.917073282  
 0.6571549 0.5993018 1.5157517 0.4797846 0.5219312 2.1955214 0.512120767 0.978412443

**V218**

r
